# Supplementary material for: Combining Dietary Sulfur Amino Acid Restriction with Polyunsaturated Fatty Acid Intake in Humans: A Randomized Controlled Pilot Trial
Source: PubMed Central journal article supplement (PMC6315936; doi:10.3390/nu10121822), 2018-11-23
Supplement: nutrients-10-01822-s001.pdf [file nutrients-10-01822-s001.pdf]

**Supplementary Table S1:** A typical daily menu in the 7-day diet.

---

**A typical daily menu**

---

|           |                                                                      |                         |
|-----------|----------------------------------------------------------------------|-------------------------|
| Breakfast | Oatmeal with apple/raisins or focaccia                               | Mixed powder with juice |
| Lunch     | Salad with kidney beans and different fruits and vegetables          | Mixed powder with juice |
| Dinner    | Vegetable casserole/vegetable soup/sweet potato casserole/bean salad | Mixed powder with juice |
| Snack     | Brazil nuts / fruits                                                 | Mixed powder with juice |

5 capsules of n-3 supplements in the PUFA-Cys/Met diet

2 capsules of n-3 supplements in the SFA+Cys/Met diet

---

**Supplementary Table S2:** Average nutrient content and composition in the 7-day diet for each intervention group.

| Nutrient content           | Cys/Met <sub>low</sub> + PUFA |        | Cys/Met <sub>high</sub> + SFA |        |
|----------------------------|-------------------------------|--------|-------------------------------|--------|
|                            | Women                         | Men    | Women                         | Men    |
| Kcal                       | 1987.3                        | 2467.6 | 1995.7                        | 2504.7 |
| Total fat, % of energy     | 32.0                          | 31.9   | 31.9                          | 32.6   |
| Total fat, g               | 70.6                          | 87.3   | 71.4                          | 91.3   |
| SFA, % of energy           | 5.5                           | 5.2    | 13.5                          | 13.3   |
| SFA, g                     | 12.4                          | 14.6   | 30.3                          | 37.2   |
| PUFA, % of energy          | 10.9                          | 10.6   | 3.3                           | 3.2    |
| PUFA, g                    | 22.9                          | 29.0   | 7.4                           | 9.0    |
| n-3 PUFA, g                | 5.2                           | 5.9    | 1.5                           | 1.8    |
| n-6 PUFA, g                | 18.3                          | 22.1   | 5.0                           | 6.2    |
| MUFA, % of energy          | 12.5                          | 13.2   | 11.8                          | 12.9   |
| MUFA, g                    | 27.6                          | 36.2   | 26.5                          | 36.0   |
| Carbohydrates, % of energy | 52.7                          | 51.7   | 52.0                          | 50.7   |
| Carbohydrates, g           | 262.1                         | 319.5  | 262.1                         | 319.6  |
| Protein, % of energy       | 12.2                          | 12.7   | 13.1                          | 13.3   |
| Protein, g                 | 60.6                          | 78.2   | 66.0                          | 83.7   |
| Sulfur amino acids, g      | 1.0                           | 1.2    | 5.8                           | 6.0    |
| Methionine, g              | 0.5                           | 0.6    | 2.1                           | 2.2    |
| Cysteine, g                | 0.5                           | 0.6    | 3.7                           | 3.8    |

Data are expressed as means. Cys/Met<sub>low</sub>+PUFA, diet low in cysteine and methionine and high in polyunsaturated fatty acids; Cys/Met<sub>high</sub>+SFA, diet high in cysteine, methionine and saturated fatty acids; SFA, saturated fatty acids; PUFA, polyunsaturated fatty acids; MUFA, monounsaturated fatty acids

**Supplemental Table S3: Change from baseline in metabolic parameters**

|                                  | Cys/Met <sub>low</sub> + PUFA |                      | Cys/Met <sub>high</sub> + SFA |                     | <i>p</i> |
|----------------------------------|-------------------------------|----------------------|-------------------------------|---------------------|----------|
|                                  | Baseline                      | End of study         | Baseline                      | End of study        |          |
| Weight (kg)                      | 66.8 (65.5 - 68.4)            | 66.4 (64.0 - 67.2)   | 65.7 (62.9 - 71.5)            | 64.6 (62.2 - 71.6)  | 0.37     |
| BMI (kg/m <sup>2</sup> )         | 22.6 (22.3 - 23.4)            | 22.4 (21.8 - 22.8)   | 22.3 (21.7 - 23.5)            | 22.3 (21.8 - 23.1)  | 0.32     |
| Body fat percent                 | 27.5 (20.1 - 28.3)            | 26.4 (19.7 - 28.2)   | 26.0 (20.5 - 28.8)            | 25.2 (19.5 - 27.1)  | 0.62     |
| Waist circumference (cm)         | 75.0 (70.5 - 80.3)            | 76.0 (70.0 - 79.0)   | 75.0 (71.0 - 77.5)            | 73.5 (69.0 - 75.8)  | 0.65     |
| Hip circumference (cm)           | 101.0 (98.3 - 101.5)          | 100.0 (96.3 - 101.8) | 99.0 (96.0 - 100.8)           | 98.0 (95.5 - 101.0) | 0.90     |
| Waist-hip ratio                  | 0.74 (0.71 - 0.80)            | 0.74 (0.72 - 0.78)   | 0.75 (0.73 - 0.78)            | 0.75 (0.71 - 0.76)  | 0.90     |
| Systolic blood pressure (mm/Hg)  | 110 (102 - 119)               | 103 (100 - 108)      | 106 (101 - 112)               | 105 (100 - 109)     | 0.06     |
| Diastolic blood pressure (mm/Hg) | 70 (68 - 73)                  | 64 (60 - 67)         | 65 (61 - 67)                  | 59 (58 - 62)        | 0.12     |
| Heart rate (bpm)                 | 64 (63 - 65)                  | 62 (55 - 65)         | 60 (56 - 73)                  | 63 (55 - 70)        | 0.90     |
| Mean arterial pressure (mm/Hg)   | 82 (80 - 94)                  | 79 (76 - 83)         | 80 (77 - 83)                  | 76 (75 - 78)        | 0.12     |
| Glucose 0 h (mmol/L)             | 4.5 (4.4 - 5.2)               | 5.0 (4.8 - 5.3)      | 4.5 (4.1 - 5.0)               | 5.0 (4.7 - 5.2)     | 0.90     |
| Glucose 2 h (mmol/L)             | 5.0 (4.4 - 5.9)               | 5.5 (5.4 - 6.2)      | 6.4 (6.4 - 6.9)               | 5.9 (4.9 - 6.6)     | 0.14     |
| Total cholesterol (mmol/L)       | 4.4 (4.3 - 4.5)               | 3.8 (3.6 - 3.9)      | 3.8 (3.6 - 4.0)               | 3.9 (3.6 - 4.0)     | 0.055    |
| HDL cholesterol (mmol/L)         | 1.6 (1.4 - 1.9)               | 1.4 (1.3 - 1.8)      | 1.5 (1.4 - 1.9)               | 1.3 (1.3 - 1.7)     | 0.95     |
| LDL cholesterol (mmol/L)         | 2.5 (2.3 - 2.6)               | 2.0 (1.9 - 2.4)      | 2.0 (1.8 - 2.1)               | 2.1 (1.9 - 2.2)     | 0.095    |
| Triglycerides (mmol/L)           | 0.7 (0.6 - 0.9)               | 0.5 (0.5 - 0.6)      | 0.8 (0.6 - 1.0)               | 0.6 (0.6 - 0.8)     | 0.092    |

Data are expressed as median (25 - 75th percentile) at baseline and end of study

*p*-values between groups median change was obtained by Wilcoxon signed-rank test

Cys/Met<sub>low</sub>+PUFA, diet low in cysteine and methionine and high in polyunsaturated fatty acids;

Cys/Met<sub>high</sub>+SFA, diet high in cysteine, methionine and saturated fatty acids; BMI, body mass index,

HDL, high-density lipoprotein; LDL, low-density lipoprotein

**Supplementary Table S4: Fatty acids and SCD activity indices.**

| <b>Fatty acid</b> | <b>Group</b>                 | <b>Baseline</b>     | <b>Day 1</b>         | <b>Day 7</b>         | <b><i>p</i> for interaction</b> |
|-------------------|------------------------------|---------------------|----------------------|----------------------|---------------------------------|
| C16               | Cys/Met <sub>low</sub> +PUFA | 1710 (1410, 2010)   | 1690 (1380, 2010)    | 1460 (1140, 1770)    | 0.200                           |
|                   | Cys/Met <sub>high</sub> +SFA | 1470 (1170, 1780)   | 1560 (1250, 1860)    | 1510 (1210, 1820)    |                                 |
| C16:1             | Cys/Met <sub>low</sub> +PUFA | 180 (122, 239)      | 208 (146, 270)       | 151 (88.5, 213)      | 0.700                           |
|                   | Cys/Met <sub>high</sub> +SFA | 164 (106, 223)      | 155 (95.5, 215)      | 168 (108, 227)       |                                 |
| C18               | Cys/Met <sub>low</sub> +PUFA | 618 (547, 688)      | 546 (471, 622)       | 440 (365, 516)       | 0.055                           |
|                   | Cys/Met <sub>high</sub> +SFA | 520 (449, 591)      | 519 (447, 592)       | 507 (434, 579)       |                                 |
| C18:1             | Cys/Met <sub>low</sub> +PUFA | 1720 (1420, 2010)   | 1600 (1300, 1910)    | 1370 (1070, 1680)    | 0.150                           |
|                   | Cys/Met <sub>high</sub> +SFA | 1510 (1220, 1800)   | 1460 (1160, 1760)    | 1470 (1170, 1770)    |                                 |
| SCD-16            | Cys/Met <sub>low</sub> +PUFA | 0.101 (0.085, 0.12) | 0.111 (0.094, 0.13)  | 0.0993 (0.082, 0.12) | 0.650                           |
|                   | Cys/Met <sub>high</sub> +SFA | 0.109 (0.092, 0.13) | 0.0982 (0.082, 0.12) | 0.109 (0.092, 0.13)  |                                 |
| SCD-18            | Cys/Met <sub>low</sub> +PUFA | 2.82 (2.51, 3.12)   | 2.91 (2.59, 3.23)    | 3.11 (2.79, 3.43)    | 0.500                           |
|                   | Cys/Met <sub>high</sub> +SFA | 2.86 (2.55, 3.16)   | 2.78 (2.47, 3.09)    | 2.85 (2.54, 3.16)    |                                 |

Estimated marginal mean (95% CI) fatty acid concentrations at baseline, day 3 and day 7 in diet interventions. *p*-values are computed using linear mixed model regression with group, time and group\*time interaction term in the model. Cys/Met<sub>low</sub>+PUFA, diet low in cysteine and methionine and high in polyunsaturated fatty acids; Cys/Met<sub>high</sub>+SFA, diet high in cysteine, methionine and saturated fatty acids; SCD, stearyl-CoA desaturase
